# Supplementary material for: The immediate effect of a single session of pain neuroscience education on pain and the autonomic nervous system in subjects with persistent pain, a pilot study
Source: PeerJ. 2021 May 31;9:e11543. doi: 10.7717/peerj.11543 (PMC8174152; doi:10.7717/peerj.11543)
Supplement: Supplemental Information 1 [file peerj-09-11543-s001.xlsx]

## Sheet: Sheet1
	Chronic group	Age	gender	L average size	post size 1	post size 2	L amount change pre/post 1	L amount change pre/post 2	R average size	post size 1	post size 2	R amt change pre/post 1	R amt change pre/post 2	pre pain lv 1-10	post pain lv	change in pain	global rate change	group a/b
	1	39	F	119.107	145.425	109.07	26.3179	-10.037	160.286	208.089	182.306	47.8025	22.0194	5.1	4	-1.1	1	a
	2	56	F	113.957	107.07	92.1698	-6.88728	-21.7871	103.628	130.918	124.375	27.2894	20.7466	3.8	4.5	0.7	-3	a
	3	65	F	58.6108	60.3654	67.335	1.75466	8.72426	61.8593	54.1441	87.3132	-7.7152	25.4539	2.3	0.7	-1.6	3.5	a
	4	56	F	46.11	43.6309	61.9424	-2.47917	15.8324	45.5946	43.0289	51.9338	-2.56569	6.33922	0.6	0.5	-0.1	0	a
	5	21	F	86.3031	86.9419	91.7758	0.638814	5.47268	82.5023	83.2784	79.6783	0.776035	-2.82406	4.5	1	-3.5	3	a
	6	37	F	37.1402	34.265	35.1772	-2.87525	-1.96299	33.9723	33.2669	34.5025	-0.705392	0.530147	2.5	0.2	-2.3	3	a
	7	65	M	156.434	51.8044	52.0645	-104.629	-104.369	59.4324	50.326	50.6471	-9.10637	-8.78529	2.8	2.7	-0.1	0	a
	8	60	F	61.7926	67.9985	67.4434	6.20588	5.65074	62.3449	69.3703	69.1233	7.02549	6.77843	5.9	4.8	-1.1	0	a
	9	38	F	58.9218	65.2667	54.4679	6.34485	-4.45392	40.6554	40.439	38.8779	-0.216422	-1.77745	4.9	5	0.1	1	a
	10	62	F	65.3814	49.3201	47.5257	-16.0613	-17.8556	58.6645	44.0471	42.5863	-14.6174	-16.0782	4.2	3.9	-0.3	0	a
	11	46	F	52.7944	57.3066	60.2566	4.51225	7.46225	49.1333	49.9118	50.1409	0.778431	1.0076	3.2	0	-3.2	2	a
	12	65	F	48.8664	48.4833	47.323	-0.383088	-1.54338	46.5716	45.2488	44.9037	-1.32279	-1.66789	2.5	1.2	-1.3	1	a
	13	65	F	42.0123	43.5792	44.9721	1.56691	2.9598	40.7132	45.7012	47.1806	4.98799	6.4674	4	3.9	-0.1	1	a
	14	51	F	210.175	165.517	114.932	-44.6581	-95.2439	78.6892	130.955	167.166	52.2654	88.4767	2.7	1.3	-1.4	-	a
	15	65	F	131.167	55.962	122.016	75.2049	9.15074	49.3172	57.6377	123.946	-8.32059	-74.6292	2.9	1.6	-1.3	4	a
	16	53	F	35.0096	36.4591	35.9652	-1.44951	-0.955637	34.8429	34.9529	35.0765	-0.110049	-0.233578	2.7	4.3	1.6	-1	a
	17	38	F	58.2755	56.5625	53.5049	1.71299	4.77059	58.2319	57.9971	55.1926	0.234804	3.03922	2	0.4	-1.6	4	a
	18	62	F	180.945	154.628	181.024	26.3174	-0.0784314	125.462	93.3534	86.8078	32.1088	38.6544	2.7	2.4	-0.3	1	a
	19	42	F	84.1157	93.1059	91.4532	-8.9902	-7.3375	70.6554	78.6343	74.0373	-7.97892	-3.38186	6.2	6.5	0.3	0	a
	20	36	F	59.5998	72.9066	60.9191	-13.3069	-1.31936	58.1507	69.3799	61.9105	-11.2292	-3.7598	3.5	1.2	-2.3	2	a
	21	53	?	72.9066	60.9191	59.5998	11.9875	13.3069	69.3799	61.9105	58.1507	7.46936	11.2292	3.2	0.9	-2.3	0	a
	22	60	F	38.5642	36.8556	35.3397	1.70858	3.22451	39.8542	37.4728	34.4838	2.38137	5.37034	8	2.4	-5.6	2	a
	23	32	M	52.3539	47.4333	49.3669	4.92059	2.98701	55.3691	49.6066	51.3735	5.7625	3.99559	2.7	2	-0.7	2	a
	24	65	M	90.4659	88.0998	87.2848	2.36618	3.18113	153.217	116.695	52.2355	36.5221	100.981	8.3	7.1	-1.2	1	a
	25	59	F	53.3574	49.2025	47.1576	4.1549	6.19975	50.9544	47.1848	46.1076	3.76961	4.84681	1.3	1.2	-0.1	0.4	a
	26	28	F	130.837	105.63	104.932	25.2069	25.9051	77.2966	96.527	68.2919	-19.2304	9.00466	7.1	7.3	0.2	0	a
